# Supplementary material for: Preparation and characterization of porous polyelectrolyte complex membranes for nanofiltration
Source: Royal Society of Chemistry journal article supplement (doi:10.1039/c4ra13699c), 2014-12-05
Supplement: c4ra13699c1.pdf [file c4ra13699c1.pdf]

## Electronic Supplementary Information

### Preparation and Characterization of Porous Polyelectrolyte Complex Membranes for Nanofiltration

Yanqin Yang,<sup>ab</sup> Qifeng Zhang,<sup>a</sup> Shenghai Li,<sup>a</sup> and Suobo Zhang<sup>a\*</sup>

<sup>a</sup> Key Laboratory of Polymer Ecomaterials, Changchun Institute of Applied Chemistry, Chinese Academy of Sciences, Changchun 130022, China.

<sup>b</sup> University of Chinese Academy of Sciences, Beijing 100049, China.

\*Corresponding author. Fax: +86 431 85262117; Tel: +86 431 85262118; E-mail:

[sbzhang@ciac.ac.cn](mailto:sbzhang@ciac.ac.cn)

#### Contents

**Fig. S1** <sup>13</sup>C NMR spectra of the copolymers.

**Fig. S2** FT-IR spectra of membranes.

**Fig. S3** TGA curves of the membranes.

**Fig. S4** (a) Top surface SEM images of NPCM-1-2; (b) Bottom surface SEM images of NPCM-1-2.

**Table S1** Elemental analysis of P(AA<sub>1</sub>-co-AN<sub>x</sub>).

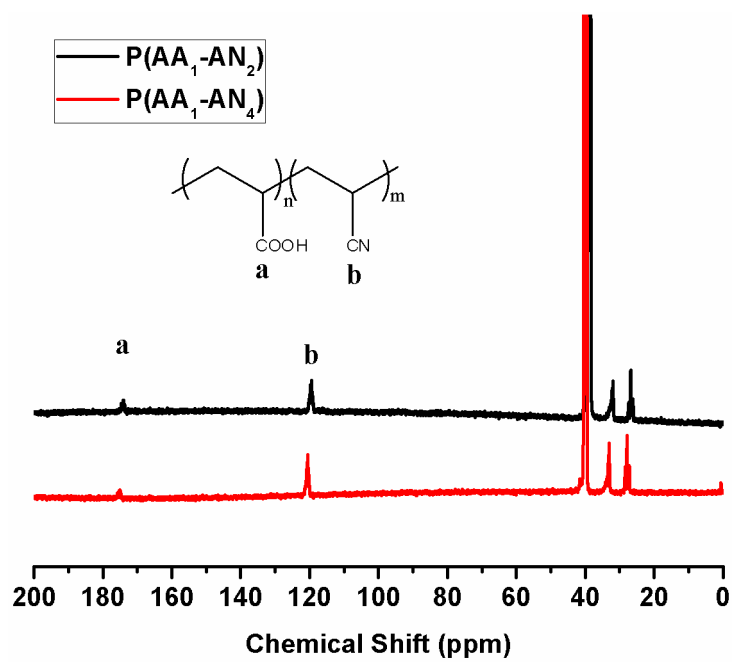

Fig. S1.  $^{13}\text{C}$  NMR spectra of the copolymers.

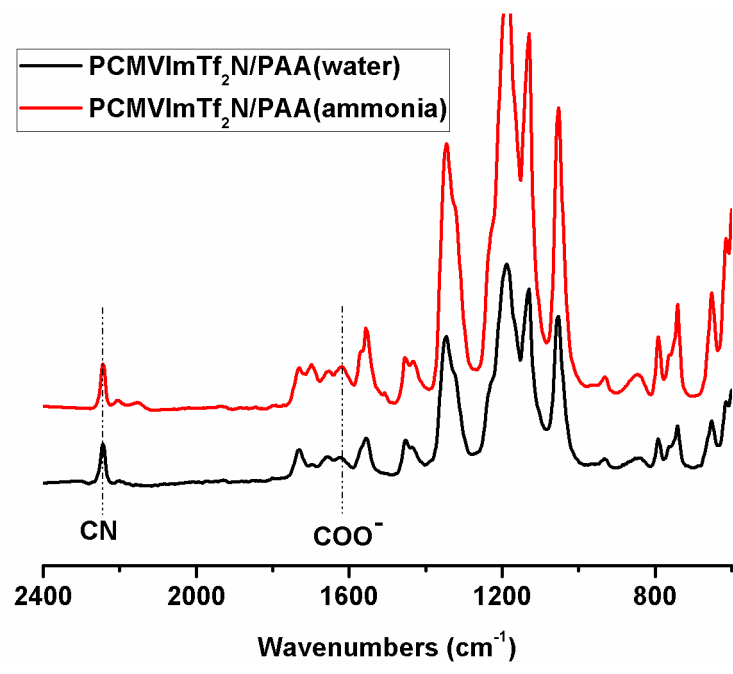

Fig. S2 FT-IR spectra of membranes.

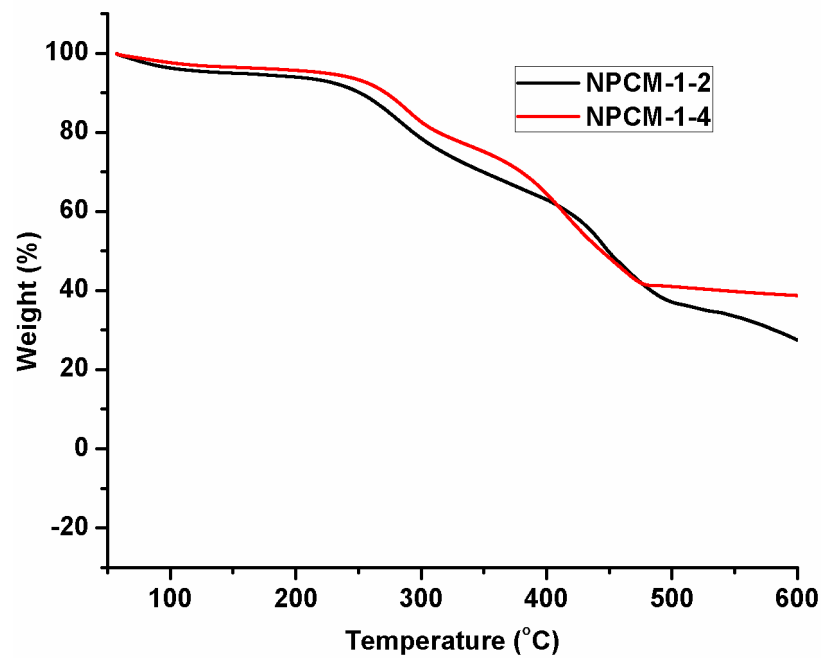

**Fig. S3** TGA curves of the membranes.

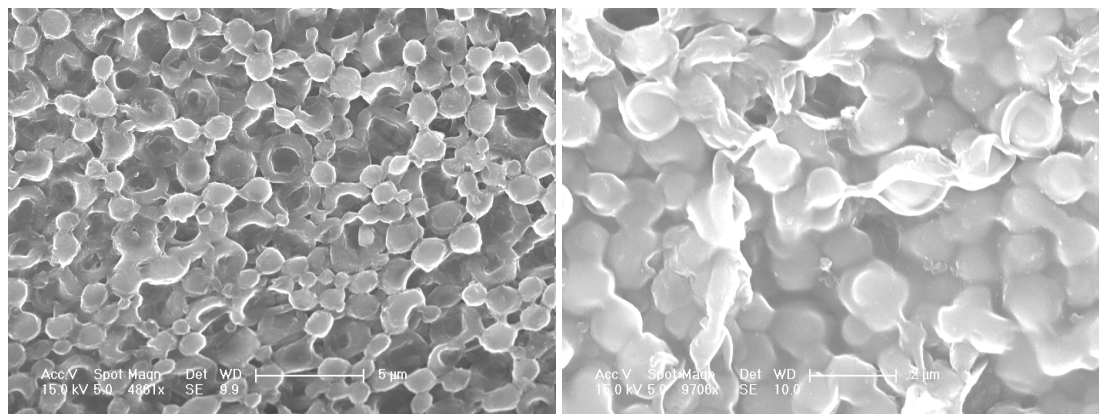

(a)

(b)

**Fig. S4** (a) Top surface SEM images of NPCM-1-2; (b) Bottom surface SEM images of NPCM-1-2.

**Table S1** Elemental analysis of P(AA<sub>1</sub>-co-AN<sub>x</sub>).

|                                         | <b>N [%]</b> | <b>C [%]</b> | <b>H [%]</b> |
|-----------------------------------------|--------------|--------------|--------------|
| P(AA <sub>1</sub> -co-AN <sub>2</sub> ) | 16.90        | 59.98        | 5.808        |
| P(AA <sub>1</sub> -co-AN <sub>4</sub> ) | 20.15        | 61.72        | 5.822        |
